# Supplementary material for: Electroconvulsive Therapy and the Risk of Suicide in Hospitalized Patients With Major Depressive Disorder
Source: PubMed Central journal article supplement (PMC8295734; doi:10.1001/jamanetworkopen.2021.16589), 2021-07-21
Supplement: jamanetwopen-e2116589-s001.pdf [file jamanetwopen-e2116589-s001.pdf]

## Supplementary Online Content

Rönnqvist I, Nilsson FK, Nordenskjöld A. Electroconvulsive therapy and the risk of suicide in hospitalized patients with major depressive disorder. *JAMA Netw Open*. 2021;4(7):e2116589. doi:10.1001/jamanetworkopen.2021.16589

**eTable 1.** List of ICD-10 Codes Used

**eTable 2.** Anatomical Therapeutic Chemical Classification (ATC) Codes

**eTable 3.** National Classification of Health Interventions Codes (KVÅ) for ECT

**eTable 4.** Details of ECT

**eTable 5.** Baseline Characteristics of Patients With Depression Treated With and Without Electroconvulsive Therapy Based on Inpatient Episodes

**eTable 6.** Results of Univariate and Multivariate Cox Regression Analyses of the Risk of Suicide Within 3 Months After Discharge for Patients With Depression, Based on Inpatient Episodes

This supplementary material has been provided by the authors to give readers additional information about their work.

**eTable 1.** List of ICD-10 Codes Used

|                                              | <b>ICD-10 codes</b> |
|----------------------------------------------|---------------------|
| <b>Main diagnosis</b>                        |                     |
| Moderate depression                          | F32.1, F33.1        |
| Severe depression without psychotic symptoms | F32.2, F33.2        |
| Severe depression with psychotic symptoms    | F32.3, F33.3        |
| <b>Psychiatric comorbidity</b>               |                     |
| Anxiety disorder                             | F40-F48             |
| Personality disorder                         | F60-F61             |
| Alcohol use disorder                         | F10                 |
| Substance use disorder                       | F11-F16, F18-F19    |
| <b>Somatic comorbidity</b>                   |                     |
| Ischemic heart disease                       | I20-I25             |
| Heart failure                                | I50                 |
| Stroke                                       | I60-I66             |
| Cancer                                       | C00-C97             |
| Spinal disease                               | M45-M54             |
| <b>Suicide attempt</b>                       |                     |
| Poisoning                                    | X60-X69, Y10-Y19    |
| Other method                                 | X70-X84, Y20-Y34    |
| <b>Suicide</b>                               | X60-X84, Y10-Y34    |

**eTable 2.** Anatomical Therapeutic Chemical Classification (ATC) Codes

|                                       | <b>ATC</b> |
|---------------------------------------|------------|
| Antidepressants                       | N06A       |
| Lithium                               | N05AN      |
| Drugs used in diabetes                | A10        |
| Drugs for obstructive airway diseases | R03        |

**eTable 3.** National Classification of Health Interventions Codes (KVÄ) for ECT

|                  | <b>KVÄ</b> |
|------------------|------------|
| ECT, unspecified | DA006      |
| ECT, unilateral  | DA024      |
| ECT, bilateral   | DA025      |

**eTable 4.** Details of ECT

|                             | Mean (SD)   | N    |
|-----------------------------|-------------|------|
| <b>Pulse width (ms)</b>     | 0.50 (0.12) | 3818 |
| <b>Frequency (Hz)</b>       | 62 (20)     | 3801 |
| <b>Duration (s)</b>         | 6.7 (1.4)   | 3778 |
| <b>Current (s)</b>          | 841 (57)    | 3784 |
| <b>Charge (mA)</b>          | 346 (147)   | 3817 |
| <b>Seizure duration (s)</b> | 49 (23)     | 3705 |

**eTable 5.** Baseline Characteristics of Patients With Depression Treated With and Without Electroconvulsive Therapy Based on Inpatient Episodes

|                                         | <b>ECT group</b><br>(n = 11578) | <b>Non-ECT group</b><br>(n = 31591) |                |
|-----------------------------------------|---------------------------------|-------------------------------------|----------------|
|                                         | n (%)                           | n (%)                               | <b>P-value</b> |
| <b>Sex</b>                              |                                 |                                     | <0.001         |
| Male                                    | 4507 (38.9)                     | 13786 (43.6)                        |                |
| Female                                  | 7071 (61.1)                     | 17805 (56.4)                        |                |
| <b>Age, mean years (SD)</b>             | 57.2 (18.5)                     | 46.3 (19.1)                         |                |
| <b>Marital status</b>                   |                                 |                                     | <0.001         |
| Married/cohabiting                      | 4483 (38.7)                     | 8313 (26.3)                         |                |
| Divorced                                | 2103 (18.2)                     | 5979 (18.9)                         |                |
| Widowed                                 | 1250 (10.8)                     | 1754 (5.6)                          |                |
| Unmarried or unknown                    | 3742 (32.3)                     | 15545 (49.2)                        |                |
| <b>Household</b>                        |                                 |                                     | <0.001         |
| Not living alone                        | 6094 (52.6)                     | 15583 (49.3)                        |                |
| Living alone or unknown                 | 5484 (47.4)                     | 16008 (50.7)                        |                |
| <b>Education level</b>                  |                                 |                                     | <0.001         |
| Low ( $\leq 9$ years) or unknown        | 3009 (25.7)                     | 8896 (27.9)                         |                |
| Middle (9–12 years)                     | 5290 (45.2)                     | 14647 (45.9)                        |                |
| High (>12 years)                        | 3413 (29.1)                     | 8366 (26.2)                         |                |
| <b>Parental education level</b>         |                                 |                                     | <0.001         |
| Low ( $\leq 9$ years)                   | 2535 (21.9)                     | 5551 (17.6)                         |                |
| Middle (9–12 years)                     | 2728 (23.6)                     | 9966 (31.5)                         |                |
| High (>12 years)                        | 1718 (14.8)                     | 6816 (21.6)                         |                |
| Unknown                                 | 4597 (39.7)                     | 9258 (29.3)                         |                |
| <b>Employment status</b>                |                                 |                                     | <0.001         |
| Employed                                | 5464 (47.2)                     | 17972 (56.9)                        |                |
| Unemployed or unknown                   | 6114 (52.8)                     | 13619 (43.1)                        |                |
| <b>Severity of depression</b>           |                                 |                                     | <0.001         |
| Moderate (F32.1, F33.1)                 | 2405 (20.8)                     | 15220 (48.2)                        |                |
| Severe without psychosis (F32.2, F33.2) | 6243 (53.9)                     | 11956 (37.8)                        |                |
| Severe with psychosis (F32.3, F33.3)    | 2930 (25.3)                     | 4415 (14.0)                         |                |
| <b>Psychiatric comorbidity</b>          |                                 |                                     |                |
| Anxiety disorder                        | 4286 (37.0)                     | 11058 (35.0)                        | <0.001         |
| Personality disorder                    | 919 (7.9)                       | 2719 (8.6)                          | 0.027          |
| Alcohol use disorder                    | 1027 (8.9)                      | 4214 (13.3)                         | <0.001         |
| Substance use disorder                  | 1118 (9.7)                      | 3915 (12.4)                         | <0.001         |
| <b>Somatic comorbidity</b>              |                                 |                                     |                |
| Drugs used in diabetes                  | 1071 (9.3)                      | 2447 (7.7)                          | <0.001         |
| Drugs for obstructive airway diseases   | 2678 (23.1)                     | 7875 (24.9)                         | <0.001         |
| Ischemic heart disease                  | 673 (5.8)                       | 1662 (5.3)                          | 0.025          |
| Heart failure                           | 278 (2.4)                       | 852 (2.7)                           | 0.088          |
| Stroke                                  | 411 (3.5)                       | 1161 (3.7)                          | 0.538          |
| Cancer                                  | 773 (6.7)                       | 1428 (4.5)                          | <0.001         |

|                                                         |              |              |        |
|---------------------------------------------------------|--------------|--------------|--------|
| Spinal disease                                          | 788 (6.8)    | 2291 (7.3)   | 0.111  |
| <b>Suicide attempt – poisoning</b>                      |              |              | <0.001 |
| Within 365 days                                         | 979 (8.5)    | 3406 (10.8)  |        |
| Earlier than 365 days                                   | 1041 (9.0)   | 3133 (9.9)   |        |
| No                                                      | 9558 (82.6)  | 25052 (79.3) |        |
| <b>Suicide attempt – other method</b>                   |              |              | 0.288  |
| Within 365 days                                         | 232 (2.0)    | 711 (2.3)    |        |
| Later than 365 days                                     | 327 (2.8)    | 875 (2.8)    |        |
| No                                                      | 11019 (95.2) | 30005 (95.0) |        |
| <b>Pharmacotherapy within 3 months before admission</b> |              |              |        |
| Antidepressants                                         | 9356 (80.7)  | 20737 (65.6) | <0.001 |
| Lithium                                                 | 607 (5.2)    | 864 (2.7)    | <0.001 |
| <b>Pharmacotherapy within 3 months after admission</b>  |              |              |        |
| Antidepressants                                         | 10036 (86.7) | 26882 (85.1) | <0.001 |
| Lithium                                                 | 1254 (10.8)  | 1263 (4.0)   | <0.001 |
| <b>Pharmacotherapy within 12 months after admission</b> |              |              |        |
| Antidepressants                                         | 11090 (95.8) | 29023 (91.9) | <0.001 |
| Lithium                                                 | 2101 (18.1)  | 2132 (6.7)   | <0.001 |
| <b>Compulsory psychiatric treatment</b>                 |              |              | <0.001 |
| Yes                                                     | 1929 (16.7)  | 4464 (14.1)  |        |
| No                                                      | 9649 (83.3)  | 27127 (85.9) |        |
| <b>Family history of mental disorder</b>                |              |              | 0.734  |
| Yes                                                     | 1304 (11.3)  | 3595 (11.4)  |        |
| No                                                      | 10274 (88.7) | 27996 (88.6) |        |
| <b>Family history of suicide</b>                        |              |              | 0.024  |
| Yes                                                     | 453 (3.9)    | 1092 (3.5)   |        |
| No                                                      | 11125 (96.1) | 30499 (96.5) |        |
|                                                         |              |              |        |

ECT: electroconvulsive therapy; SD: standard deviation.

**eTable 6.** Results of Univariate and Multivariate Cox Regression Analyses of the Risk of Suicide Within 3 Months After Discharge for Patients With Depression, Based on Inpatient Episodes

|                                         | HR (95% CI)       | P-value | aHR (95% CI)     | P-value |
|-----------------------------------------|-------------------|---------|------------------|---------|
| <b>Treatment</b>                        |                   |         |                  |         |
| Non-ECT                                 | Reference         |         | Reference        |         |
| ECT                                     | 0.66 (0.47–0.93)  | 0.017   | 0.58 (0.40–0.83) | 0.003   |
| <b>Sex</b>                              |                   |         |                  |         |
| Male                                    | Reference         |         | Reference        |         |
| Female                                  | 0.41 (0.31–0.54)  | <0.001  | 0.46 (0.34–0.61) | <0.001  |
| <b>Age</b>                              | 1.01 (1.00–1.01)  | 0.054   | 1.03 (1.02–1.04) | <0.001  |
| <b>Marital status</b>                   |                   |         |                  |         |
| Married/cohabiting                      | Reference         |         | Reference        |         |
| Divorced                                | 0.97 (0.65–1.44)  | 0.86    | 1.05 (0.64–1.70) | 0.86    |
| Widowed                                 | 0.34 (0.14–0.83)  | 0.02    | 0.35 (0.13–0.92) | 0.03    |
| Unmarried or unknown                    | 1.06 (0.77–1.44)  | 0.74    | 1.41 (0.91–2.18) | 0.13    |
| <b>Household</b>                        |                   |         |                  |         |
| Not living alone                        | Reference         |         | Reference        |         |
| Living alone or unknown                 | 1.03 (0.79–1.35)  | 0.83    | 0.93 (0.65–1.32) | 0.67    |
| <b>Education level</b>                  |                   |         |                  |         |
| Low (≤9 years) or unknown               | Reference         |         | Reference        |         |
| Middle (9–12 years)                     | 1.28 (0.90–1.81)  | 0.17    | 1.28 (0.89–1.83) | 0.18    |
| High (>12 years)                        | 1.46 (0.999–2.12) | 0.051   | 1.42 (0.95–2.11) | 0.09    |
| <b>Parental education level</b>         |                   |         |                  |         |
| Low                                     | 1.28 (0.87–1.88)  | 0.21    | 1.21 (0.80–1.82) | 0.37    |
| Middle                                  | 0.94 (0.65–1.36)  | 0.75    | 1.13 (0.72–1.76) | 0.60    |
| High                                    | 1.43 (0.99–2.06)  | 0.60    | 1.82 (1.13–2.91) | 0.01    |
| Unknown                                 | Reference         |         | Reference        |         |
| <b>Employment status</b>                |                   |         |                  |         |
| Employed                                | 1.12 (0.85–1.47)  | 0.43    | 1.07 (0.78–1.46) | 0.69    |
| Unemployed or unknown                   | Reference         |         | Reference        |         |
| <b>Severity of depression</b>           |                   |         |                  |         |
| Moderate (F32.1, F33.1)                 | Reference         |         | Reference        |         |
| Severe without psychosis (F32.2, F33.2) | 1.28 (0.95–1.73)  | 0.11    | 1.31 (0.96–1.78) | 0.09    |
| Severe with psychosis (F32.3, F33.3)    | 1.16 (0.78–1.72)  | 0.48    | 1.13 (0.74–1.74) | 0.56    |
| <b>Psychiatric comorbidity</b>          |                   |         |                  |         |
| Anxiety disorder                        | 0.86 (0.66–1.18)  | 0.41    | 0.99 (0.72–1.37) | 0.97    |
| Personality disorder                    | 0.54 (0.29–1.02)  | 0.058   | 0.60 (0.30–1.19) | 0.15    |
| Alcohol use disorder                    | 1.30 (0.89–1.89)  | 0.17    | 1.07 (0.70–1.62) | 0.76    |
| Substance use disorder                  | 1.21 (0.82–1.79)  | 0.34    | 1.31 (0.84–2.05) | 0.23    |
| <b>Somatic comorbidity</b>              |                   |         |                  |         |
| Drugs used in diabetes                  | 0.69 (0.38–1.23)  | 0.21    | 0.67 (0.37–1.21) | 0.18    |
| Drugs for obstructive airway diseases   | 0.68 (0.48–0.97)  | 0.033   | 0.76 (0.53–1.09) | 0.13    |

|                                          |                   |       |                  |      |
|------------------------------------------|-------------------|-------|------------------|------|
| Ischemic heart disease                   | 0.97 (0.51–1.79)  | 0.93  | 0.83 (0.44–1.59) | 0.58 |
| Heart failure                            | 0.93 (0.38–2.25)  | 0.87  | 0.81 (0.32–2.05) | 0.66 |
| Stroke                                   | 0.52 (0.19–1.39)  | 0.19  | 0.41 (0.15–1.13) | 0.09 |
| Cancer                                   | 1.88 (1.17–3.01)  | 0.009 | 1.86 (1.14–3.05) | 0.01 |
| Spinal disease                           | 0.79 (0.44–1.42)  | 0.43  | 0.77 (0.43–1.40) | 0.40 |
| <b>Suicide attempt – poisoning</b>       |                   |       |                  |      |
| Within 365 days 2                        | 1.44 (0.97–2.12)  | 0.07  | 1.66 (1.10–2.52) | 0.02 |
| Earlier than 365 days 1                  | 0.75 (0.44–1.28)  | 0.29  | 0.93 (0.53–1.63) | 0.79 |
| No                                       | Reference         |       | Reference        |      |
| <b>Suicide attempt – other method</b>    |                   |       |                  |      |
| Within 365 days                          | 2.24 (1.19–4.22)  | 0.01  | 1.97 (1.03–3.77) | 0.04 |
| Earlier than 365 days                    | 0.87 (0.36–2.12)  | 0.76  | 1.01 (0.41–2.53) | 0.98 |
| No                                       | Reference         |       | Reference        |      |
| <b>Pharmacotherapy</b>                   |                   |       |                  |      |
| Antidepressants                          | 0.69 (0.48–1.001) | 0.051 | 0.77 (0.52–1.13) | 0.18 |
| Lithium                                  | 0.64 (0.35–1.18)  | 0.16  | 0.71 (0.38–1.32) | 0.28 |
| <b>Compulsory psychiatric treatment</b>  |                   |       |                  |      |
| Yes                                      | 1.23 (0.87–1.76)  | 0.25  | 1.19 (0.82–1.72) | 0.37 |
| No                                       | Reference         |       | Reference        |      |
| <b>Family history of mental disorder</b> |                   |       |                  |      |
| Yes                                      | 1.46 (1.01–2.12)  | 0.046 | 1.52 (1.04–2.21) | 0.03 |
| No                                       | Reference         |       | Reference        |      |
| <b>Family history of suicide</b>         |                   |       |                  |      |
| Yes                                      | 1.35 (0.72–2.55)  | 0.35  | 1.19 (0.63–2.25) | 0.60 |
| No                                       | Reference         |       | Reference        |      |

aHR: adjusted hazard ratio; ECT: electroconvulsive therapy; HR: hazard ratio.
